# Supplementary material for: Efficient CRISPR/Cas9-mediated Targeted Mutagenesis in Populus in the First Generation
Source: PubMed Central journal article supplement (PMC4507398; doi:10.1038/srep12217), 2015-07-20
Supplement: srep12217-s1.pdf [file srep12217-s1.pdf]

# Efficient CRISPR/Cas9-mediated Targeted Mutagenesis in Populus in the First Generation

**Authors:** Di Fan, Tingting Liu, Chaofeng Li, Bo Jiao, Shuang Li, Yishu Hou, Keming Luo

## Supplementary information

**Table S1.** Statistical information describing the mutant alleles of *pds* in transgenic poplars.

|                                  | Plant ID | No. of clones sequenced | No. of clones with mutant alleles | No. of different mutant alleles |
|----------------------------------|----------|-------------------------|-----------------------------------|---------------------------------|
| <i>PtoPDS</i> sgRNA1             | 1        | 18                      | 0                                 | 0                               |
|                                  | 2        | 7                       | 1                                 | 1                               |
|                                  | 3        | 10                      | 10                                | 4                               |
|                                  | 4        | 6                       | 6                                 | 3                               |
|                                  | 5        | 6                       | 6                                 | 2                               |
|                                  | 6        | 6                       | 6                                 | 2                               |
|                                  | 7        | 6                       | 6                                 | 3                               |
|                                  | 8        | 6                       | 2                                 | 1                               |
|                                  | Total    | 65                      | 37                                | 8                               |
| <i>PtoPDS</i> sgRNA2<br>& sgRNA3 | 1        | 23                      | 19                                | 1                               |
|                                  | 2        | 13                      | 13                                | 6                               |
|                                  | 3        | 20                      | 20                                | 6                               |
|                                  | 4        | 12                      | 8                                 | 3                               |
|                                  | 5        | 9                       | 9                                 | 3                               |
|                                  | 6        | 12                      | 12                                | 5                               |
|                                  | 7        | 12                      | 12                                | 6                               |
|                                  | 8        | 11                      | 7                                 | 3                               |
|                                  | Total    | 112                     | 100                               | 17                              |
| <i>PtoPDS</i> sgRNA4             | 1        | 5                       | 0                                 | 0                               |
|                                  | 2        | 6                       | 0                                 | 0                               |
|                                  | 3        | 10                      | 0                                 | 0                               |
|                                  | 4        | 6                       | 0                                 | 0                               |
|                                  | 5        | 4                       | 0                                 | 0                               |
|                                  | 6        | 6                       | 0                                 | 0                               |
|                                  | 7        | 6                       | 0                                 | 0                               |
|                                  | 8        | 5                       | 0                                 | 0                               |
|                                  | Total    | 48                      | 0                                 | 0                               |

**Figure S1.** Genomic sequence of the *PtoPDS* gene.

> *PtoPDS*

gttgaattggttttgagaaATGAGTGCATTGAACTTGAGCTGGCATAGTAAATCATTAGACTCTCAAGTTGCCTTGAGATGTGGCGCTTATCCTACTTGTTCTCACCAAACGAATGCACTAGCTTTTAGAGGCAGTGAATCAATGGGCCATTCTTTGAAATCCCATTGGAATTCTTCTGCTAAAACAAGACTAAGGAATCATATCCGCCCTCCTTTGCGGGTgcgtagttcttactacagggaattattagttgccaatcaatacgtgaaaattggggatctttgtctacgctgtaggtTGTCTGTATGGACTATCCAAGACCGGACCTTGATAACACGGTGAATTTCTTAGAGGCTGCCTTGTTATCTTCATCCTTTCGTTCTTCTCCGCGTCCAGCTAAACCATTAAATGTTGTCATTGCTGGTGCAGgtgatgaaatcttatctttttgtatgggaaaaactgtgttgattattagattgattctatctatctgtaaaacttttcgttgaaatattgcctcgtgttaattaataatttgaagctcgtactttcacaagattttgcagtactcttgagagattgtgcgatactactcgtgtgtgactaaaaatttccttatttttcagGTTTGGCGGGTTTATCGACTGCAAATACTTGGCAGATGCGGGCCATAAGCCTATATTGCTTGAAGCAAGAGATGTTTTAGGTGGAAAGGTGGCTGCATGGAAAGATGATGATGGAGACTGGTACGAGACAGGCTTGCATATATTCTTTGGGGCATATCCAAATGTGCAGAATCTTTTTGGTGAACCTTGGTATCAATGATAGGTTGCAATGGAAGGAGCATTCTATGATATTTGCAATGCCAAATAAGCCAGGAGAATTCAGTCGATTTGATTTTCCTGAAGTTCTCCCTGCACCATTAAATG
